# Supplementary material for: Dapagliflozin Added to Glimepiride in Patients with Type 2 Diabetes Mellitus Sustains Glycemic Control and Weight Loss Over 48 Weeks: A Randomized, Double-Blind, Parallel-Group, Placebo-Controlled Trial
Source: PubMed Central journal article supplement — Diabetes Ther. 2014 Jun 12;5(1):267–83. doi: 10.1007/s13300-014-0072-0 (PMC4065289; doi:10.1007/s13300-014-0072-0), 2014-06-12
Supplement: 13300_2014_72_MOESM1_ESM.pdf [file 13300_2014_72_MOESM1_ESM.pdf]

## SUPPLEMENTARY MATERIAL

**Fig. S1** Trial profile for the short-term and long-term treatment periods. The term "incorrect enrollment" was defined as patients not meeting inclusion criteria or meeting exclusion criteria during the enrollment process.

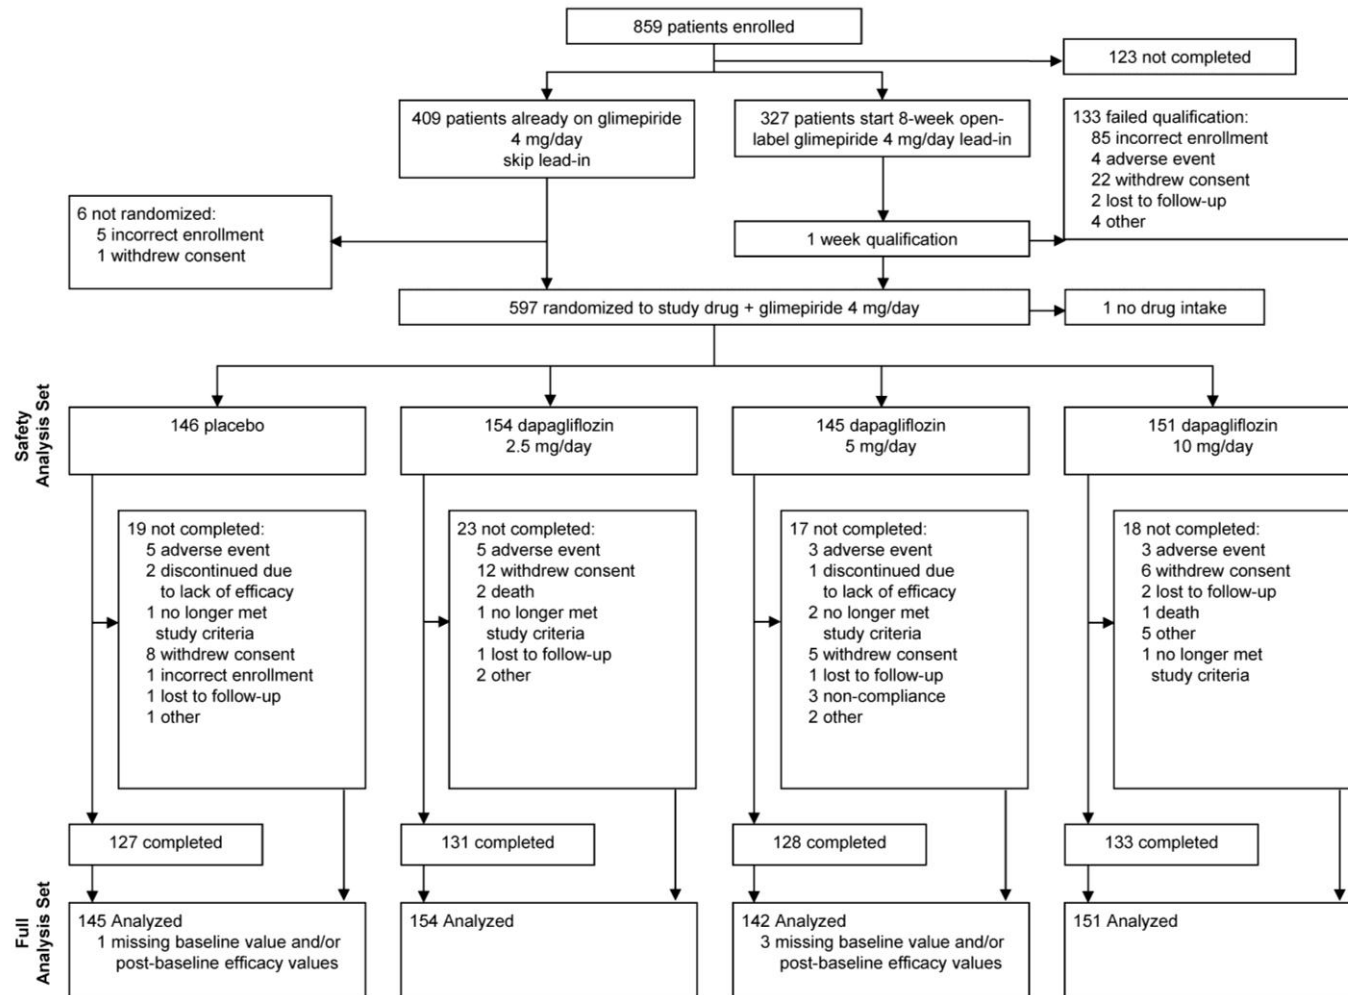

**Fig. S2** Change in HbA<sub>1c</sub> (%) with treatment over 48 weeks (full analysis set) including data after rescue therapy. \*Data are adjusted mean changes from baseline  $\pm$  95% CI derived from a repeated-measures mixed model. *N* is the number of patients in the full analysis set, and *n* is the number of patients in the full analysis set with non-missing baseline and week (t) values. Treatment group symbols are shifted horizontally to prevent error bar overlapping. *CI* confidence interval, *DAPA* dapagliflozin, *GLI* glimepiride, *PLA* placebo. Placebo-corrected values for HbA<sub>1c</sub> change from baseline at 48 weeks were  $-0.26$  (95% CI,  $-0.44, -0.07$ ),  $-0.34$  (95% CI,  $-0.53, -0.15$ ), and  $-0.50$  (95% CI,  $-0.69, -0.31$ ) in the dapagliflozin 2.5-, 5-, and 10-mg groups, respectively.

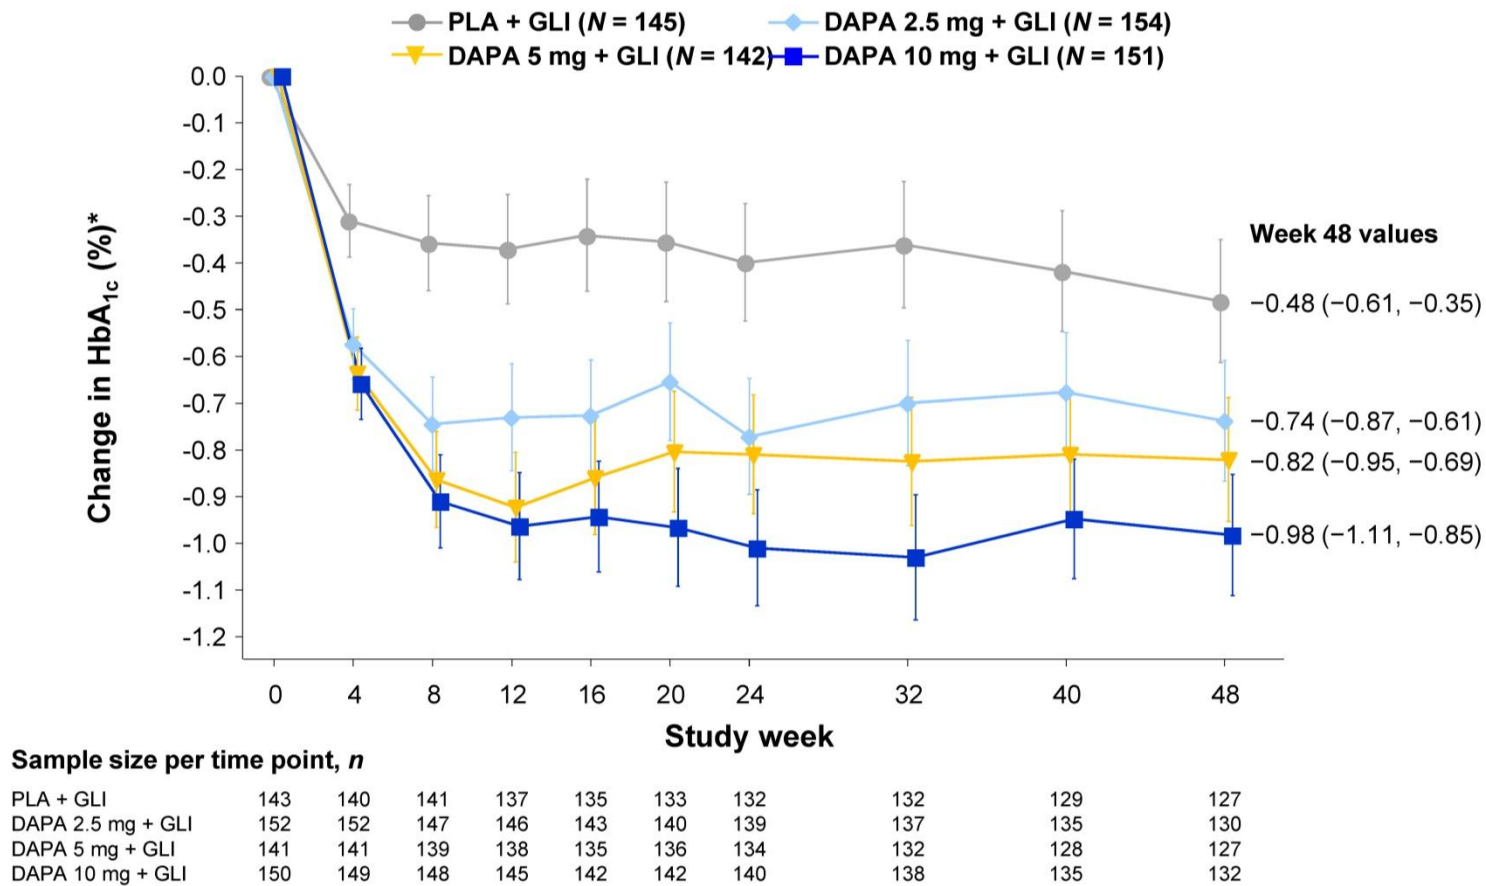

**Fig. S3** Change in systolic BP (SBP) and diastolic BP (DBP) at week 48. Data are adjusted mean changes from baseline  $\pm$  95% confidence interval derived from repeated-measures analysis, and exclude data after rescue therapy. *n* is the number of patients with non-missing baseline and week 48 values. *BP* blood pressure, *DAPA* dapagliflozin, *GLI* glimepiride, *PLA* placebo.

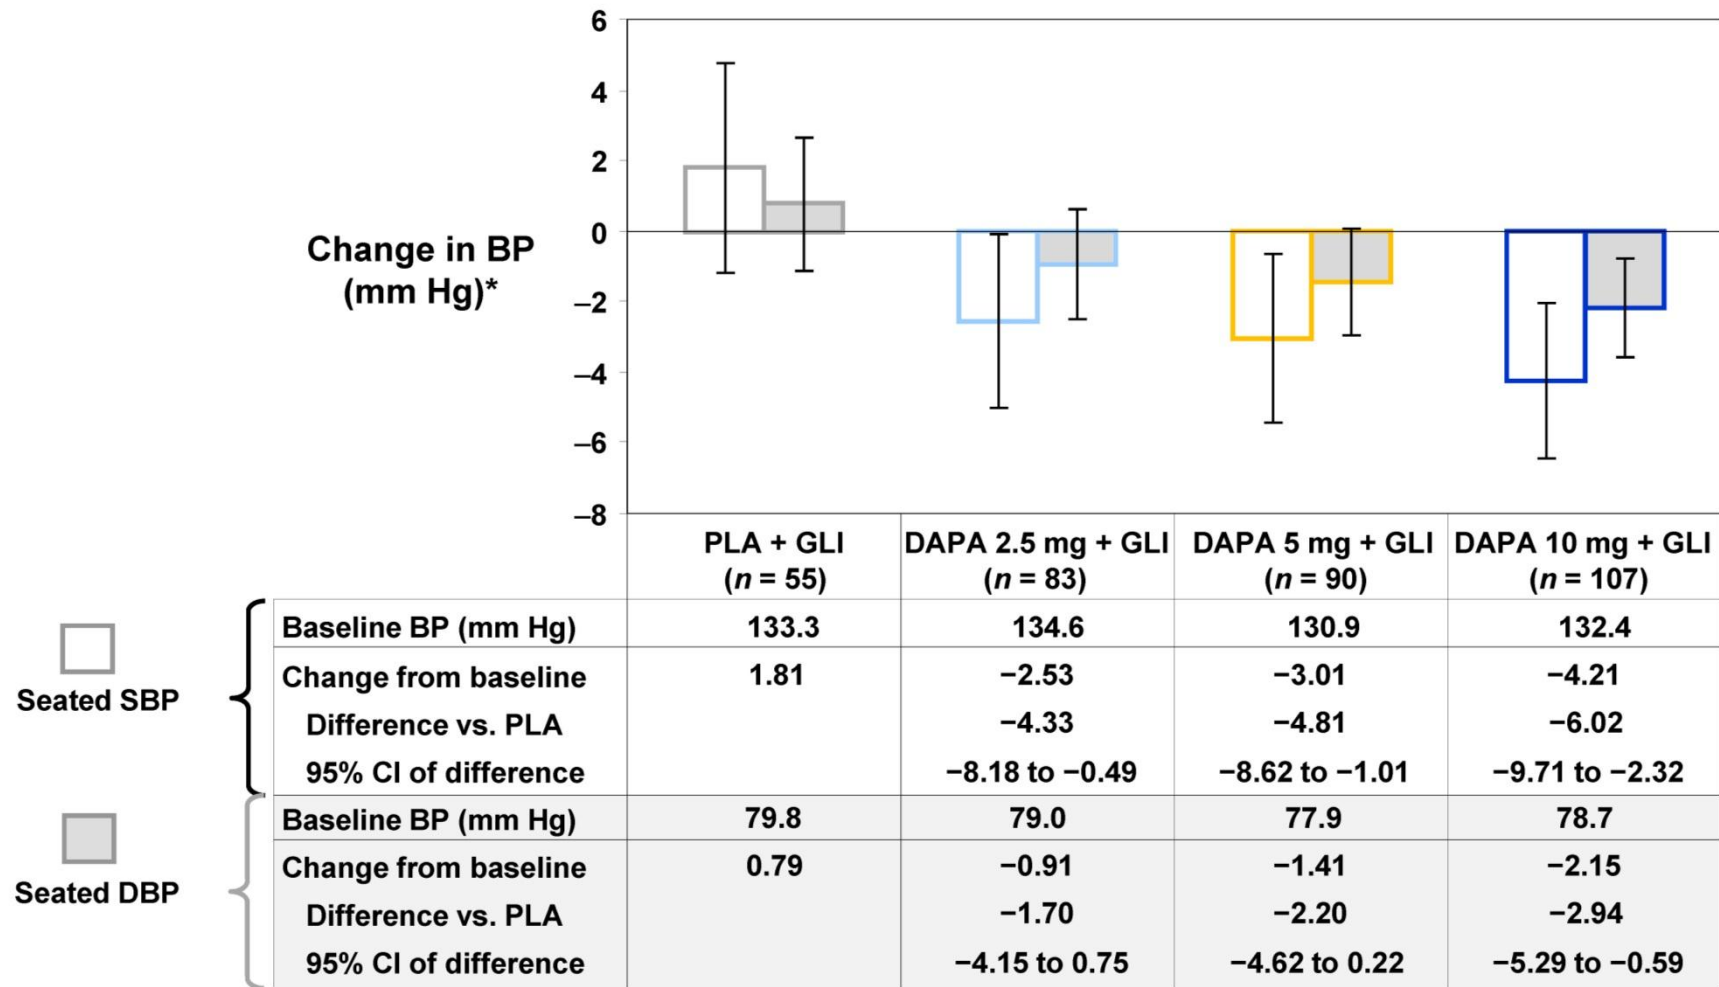

**Fig. S4** Percentage of patients experiencing their first event of hypoglycemia from 0 to 24 weeks versus 24 to 48 weeks (safety analysis set and excluding data after rescue therapy). *DAPA* dapagliflozin, *GLI* glimepiride, *PLA* placebo.

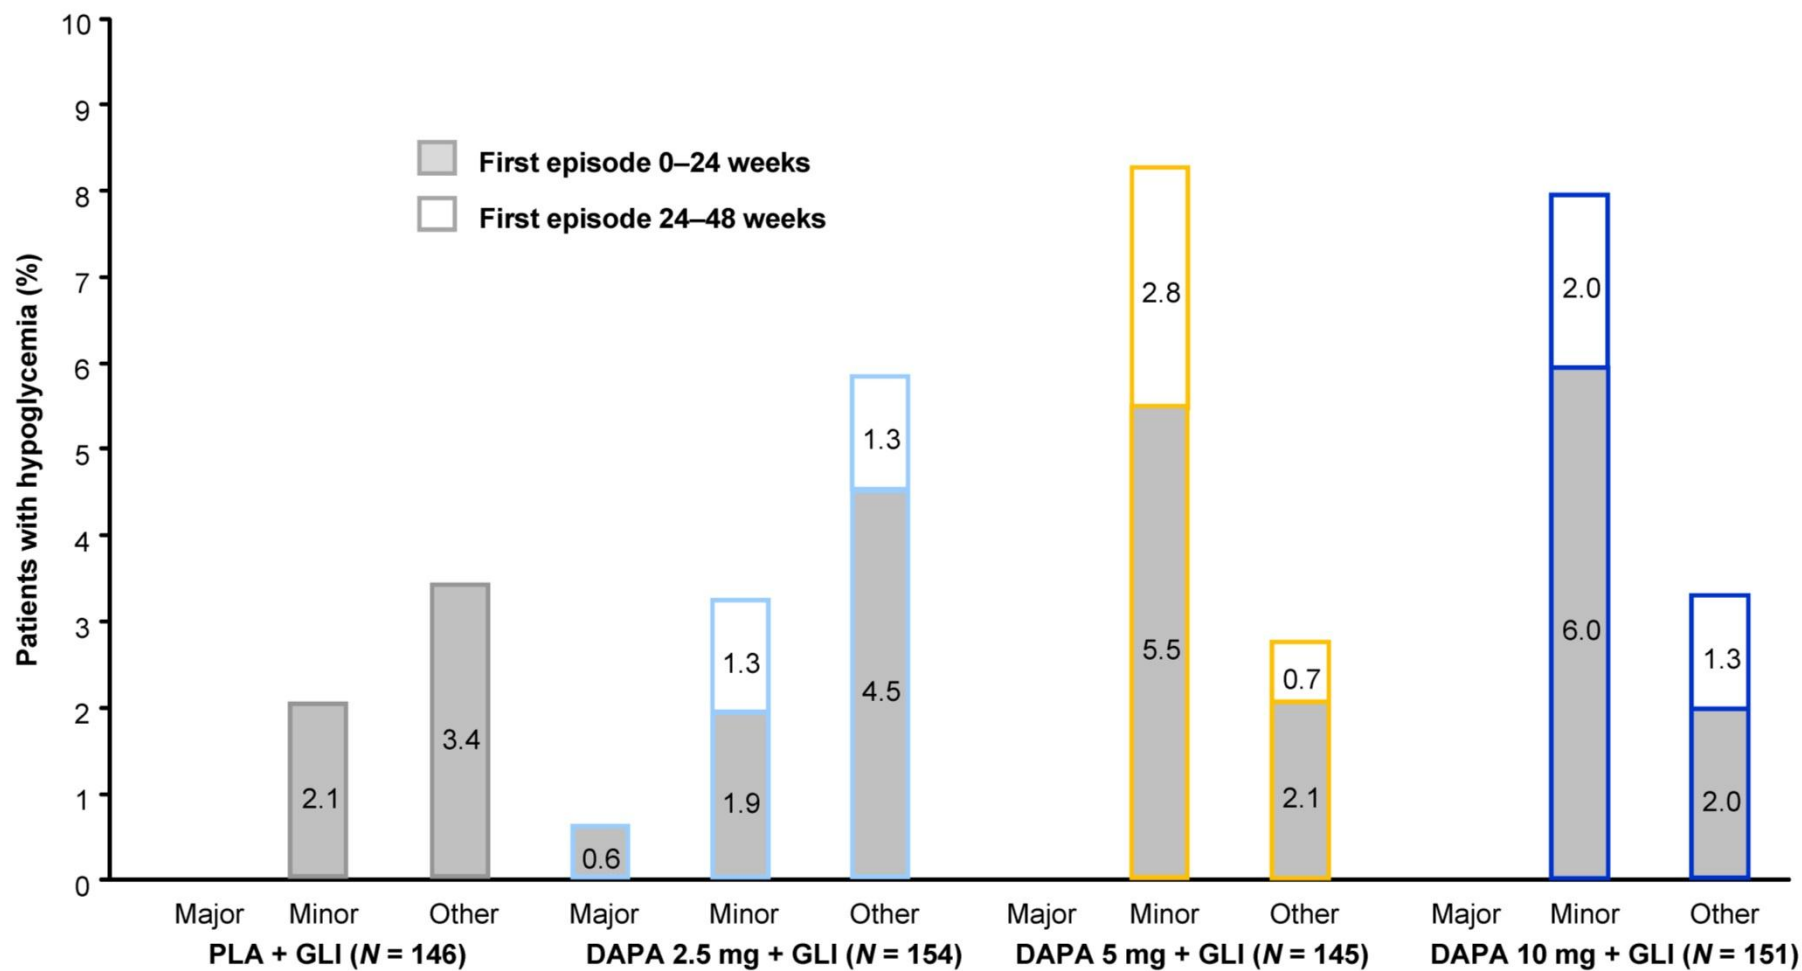

**Table S1** Changes in HbA<sub>1c</sub> (%) from week 24 at week 48<sup>a</sup>

|                              | <b>PLA<br/>+ GLI<br/>(N = 111)</b> | <b>DAPA 2.5 mg<br/>+ GLI<br/>(N = 131)</b> | <b>DAPA 5 mg<br/>+ GLI<br/>(N = 126)</b> | <b>DAPA 10 mg<br/>+ GLI<br/>(N = 138)</b> |
|------------------------------|------------------------------------|--------------------------------------------|------------------------------------------|-------------------------------------------|
| <b>Week 24</b>               |                                    |                                            |                                          |                                           |
| <i>n</i>                     | 109                                | 127                                        | 125                                      | 134                                       |
| Mean ± SD                    | 7.81 ± 0.78                        | 7.42 ± 0.80                                | 7.38 ± 0.87                              | 7.25 ± 0.83                               |
| <b>Week 48</b>               |                                    |                                            |                                          |                                           |
| <i>n</i>                     | 55                                 | 83                                         | 89                                       | 106                                       |
| Mean ± SD                    | 7.29 ± 0.66                        | 7.21 ± 0.56                                | 7.08 ± 0.75                              | 7.11 ± 0.62                               |
| Adjusted change from week 24 | 0.20                               | 0.22                                       | 0.10                                     | 0.08                                      |
| 95% CI for adjusted mean     | 0.07, 0.34                         | 0.11, 0.34                                 | -0.02, 0.21                              | -0.03, 0.19                               |
| Difference vs. PLA + GLI     |                                    | 0.02                                       | -0.11                                    | -0.12                                     |
| 95% CI for difference        |                                    | -0.16, 0.20                                | -0.29, 0.07                              | -0.30, 0.05                               |

*N* is the number of subjects in the short-term completers analysis set. At week 24, *n* corresponds to the number of patients in the short-term completers analysis set with non-missing week 24 value and at least one post-week 24 value. At week 48, *n* is the number of patients in the short-term completers analysis set with non-missing week 24 and week 48 values. *CI* confidence interval, *DAPA* dapagliflozin, *GLI* glimepiride, *PLA* placebo. <sup>a</sup>Longitudinal repeated measure analysis, excluding data after rescue therapy (short-term completers analysis set).

**Table S2** Lipid parameters and fasting C-peptide levels at weeks 24 and 48 (full analysis set)<sup>a</sup>

|                                            | <b>Placebo<br/>+ glimepiride<br/>(N = 145)</b> | <b>Dapagliflozin 2.5 mg<br/>+ glimepiride<br/>(N = 154)</b> | <b>Dapagliflozin 5 mg<br/>+ glimepiride<br/>(N = 142)</b> | <b>Dapagliflozin 10 mg<br/>+ glimepiride<br/>(N = 151)</b> |
|--------------------------------------------|------------------------------------------------|-------------------------------------------------------------|-----------------------------------------------------------|------------------------------------------------------------|
| <b>Total cholesterol</b>                   |                                                |                                                             |                                                           |                                                            |
| <i>n</i>                                   | 141                                            | 148                                                         | 139                                                       | 149                                                        |
| Baseline mean (mmol/L)                     | 4.9                                            | 4.9                                                         | 5.0                                                       | 5.0                                                        |
| Mean percent change at week 24<br>(95% CI) | 2.3 (-0.8, 5.3)                                | 5.3 (1.8, 8.7)                                              | 3.4 (0.3, 6.5)                                            | 1.8 (-1.0, 4.7)                                            |
| Mean percent change at week 48<br>(95% CI) | -0.5 (-4.7, 3.7)                               | 5.6 (1.2, 10.1)                                             | 2.2 (-1.9, 6.3)                                           | 1.5 (-1.6, 4.6)                                            |
| <b>LDL cholesterol</b>                     |                                                |                                                             |                                                           |                                                            |
| <i>n</i>                                   | 141                                            | 148                                                         | 139                                                       | 149                                                        |
| Baseline mean (mmol/L)                     | 2.8                                            | 2.8                                                         | 2.8                                                       | 2.9                                                        |
| Mean percent change at week 24<br>(95% CI) | 4.8 (-0.2, 9.8)                                | 9.7 (4.4, 15.1)                                             | 6.3 (0.9, 11.7)                                           | 4.9 (0.1, 9.8)                                             |
| Mean percent change at week 48<br>(95% CI) | -0.6 (-6.7, 5.6)                               | 7.8 (1.0, 14.6)                                             | 5.7 (-1.8, 13.3)                                          | 3.9 (-1.1, 8.9)                                            |
| <b>HDL cholesterol</b>                     |                                                |                                                             |                                                           |                                                            |
| <i>n</i>                                   | 141                                            | 148                                                         | 139                                                       | 149                                                        |
| Baseline mean (mmol/L)                     | 1.2                                            | 1.2                                                         | 1.2                                                       | 1.2                                                        |
| Mean percent change at week 24<br>(95% CI) | 4.9 (1.8, 7.9)                                 | 6.5 (3.8, 9.3)                                              | 6.0 (3.0, 9.0)                                            | 6.7 (3.8, 9.6)                                             |

|                                            | <b>Placebo<br/>+ glimepiride<br/>(N = 145)</b> | <b>Dapagliflozin 2.5 mg<br/>+ glimepiride<br/>(N = 154)</b> | <b>Dapagliflozin 5 mg<br/>+ glimepiride<br/>(N = 142)</b> | <b>Dapagliflozin 10 mg<br/>+ glimepiride<br/>(N = 151)</b> |
|--------------------------------------------|------------------------------------------------|-------------------------------------------------------------|-----------------------------------------------------------|------------------------------------------------------------|
| Mean percent change at week 48<br>(95% CI) | 5.5 (1.4, 9.6)                                 | 10.8 (7.0, 14.6)                                            | 7.9 (4.3, 11.5)                                           | 10.4 (6.8, 14.0)                                           |
| <b>Triglycerides</b>                       |                                                |                                                             |                                                           |                                                            |
| <i>n</i>                                   | 141                                            | 148                                                         | 139                                                       | 149                                                        |
| Baseline mean (mmol/L)                     | 2.1                                            | 1.9                                                         | 2.1                                                       | 2.2                                                        |
| Mean percent change at week 24<br>(95% CI) | 4.5 (-3.4, 12.3)                               | 2.8 (-4.8, 10.5)                                            | 1.4 (-5.3, 8.1)                                           | -3.9 (-9.7, 1.9)                                           |
| Mean percent change at week 48<br>(95% CI) | 3.1 (-7.0, 13.1)                               | -0.6 (-9.1, 8.0)                                            | -0.9 (-9.1, 7.3)                                          | -3.7 (-13.7, 6.4)                                          |
| <b>Free fatty acids</b>                    |                                                |                                                             |                                                           |                                                            |
| <i>n</i>                                   | 141                                            | 148                                                         | 139                                                       | 149                                                        |
| Baseline mean (mmol/L)                     | 0.6                                            | 0.5                                                         | 0.6                                                       | 0.6                                                        |
| Mean percent change at week 24<br>(95% CI) | 14.6 (4.7, 24.6)                               | 14.7 (4.7, 24.6)                                            | 20.9 (8.4, 33.4)                                          | 21.8<br>(11.0, 32.6)                                       |
| Mean percent change at week 48<br>(95% CI) | 11.8<br>(-4.1, 27.7)                           | 32.8<br>(15.8, 49.8)                                        | 25.8<br>(11.7, 40.0)                                      | 24.6<br>(11.2, 38.1)                                       |
| <b>Fasting C-peptide</b>                   |                                                |                                                             |                                                           |                                                            |
| <i>n</i>                                   | 141                                            | 148                                                         | 139                                                       | 148                                                        |
| Baseline mean (nmol/L)                     | 1.02                                           | 1.02                                                        | 1.04                                                      | 1.02                                                       |
| Mean percent change at week 24<br>(95% CI) | 0.01 (-0.06, 0.08)                             | -0.04 (0.09, 0.01)                                          | -0.05 (-0.13, 0.02)                                       | -0.07 (-0.12, -0.02)                                       |

|                                            | <b>Placebo<br/>+ glimepiride<br/>(N = 145)</b> | <b>Dapagliflozin 2.5 mg<br/>+ glimepiride<br/>(N = 154)</b> | <b>Dapagliflozin 5 mg<br/>+ glimepiride<br/>(N = 142)</b> | <b>Dapagliflozin 10 mg<br/>+ glimepiride<br/>(N = 151)</b> |
|--------------------------------------------|------------------------------------------------|-------------------------------------------------------------|-----------------------------------------------------------|------------------------------------------------------------|
| Mean percent change at week 48<br>(95% CI) | -0.01 (-0.14, 0.12)                            | -0.09 (-0.15, -0.03)                                        | -0.10 (-0.2, 0.01)                                        | -0.07 (-0.14, -0.01)                                       |

*N* is the number of patients in the full analysis set, and *n* is the number of patients with non-missing baseline values and at least one post-baseline value in the full analysis set. *CI* confidence interval, *HDL* high-density lipoprotein, *LDL* low-density lipoprotein. <sup>a</sup>Data are unadjusted mean changes from baseline ± 95% CI derived from repeated-measures analysis, and exclude data after rescue therapy.



**Table S3** Neoplasms benign, malignant, and unspecified (including cysts and polyps) over 48 weeks (safety analysis set), including data after rescue therapy<sup>a</sup>

| <b>Preferred term, <i>n</i> (%)</b>  | <b>Placebo<br/>+ glimepiride<br/>(<i>N</i> = 146)</b> | <b>Dapagliflozin 2.5 mg<br/>+ glimepiride<br/>(<i>N</i> = 154)</b> | <b>Dapagliflozin 5 mg<br/>+ glimepiride<br/>(<i>N</i> = 145)</b> | <b>Dapagliflozin 10 mg<br/>+ glimepiride<br/>(<i>N</i> = 151)</b> |
|--------------------------------------|-------------------------------------------------------|--------------------------------------------------------------------|------------------------------------------------------------------|-------------------------------------------------------------------|
| Total                                | 2 (1.4)                                               | 6 (3.9)                                                            | 4 (2.8)                                                          | 2 (1.3)                                                           |
| Breast cancer                        | 0 (0.0)                                               | 0 (0.0)                                                            | 0 (0.0)                                                          | 1 (0.7)                                                           |
| Prostatic adenoma                    | 0 (0.0)                                               | 0 (0.0)                                                            | 0 (0.0)                                                          | 1 (0.7)                                                           |
| Benign breast neoplasm               | 0 (0.0)                                               | 0 (0.0)                                                            | 1 (0.7)                                                          | 0 (0.0)                                                           |
| Benign neoplasm of the thyroid gland | 0 (0.0)                                               | 1 (0.6)                                                            | 0 (0.0)                                                          | 0 (0.0)                                                           |
| Chronic lymphocytic leukemia         | 0 (0.0)                                               | 1 (0.6)                                                            | 0 (0.0)                                                          | 0 (0.0)                                                           |
| Endometrial cancer                   | 0 (0.0)                                               | 1 (0.6)                                                            | 0 (0.0)                                                          | 0 (0.0)                                                           |
| Lipoma                               | 0 (0.0)                                               | 0 (0.0)                                                            | 1 (0.7)                                                          |                                                                   |
| Lung neoplasm                        | 0 (0.0)                                               | 1 (0.6)                                                            | 0 (0.0)                                                          | 0 (0.0)                                                           |
| Lung neoplasm, malignant             | 0 (0.0)                                               | 1 (0.6)                                                            | 1 (0.7)                                                          | 0 (0.0)                                                           |
| Mediastinum neoplasm                 | 0 (0.0)                                               | 1 (0.6)                                                            | 0 (0.0)                                                          | 0 (0.0)                                                           |
| Rectal adenoma                       | 1 (0.7)                                               |                                                                    | 1 (0.7)                                                          |                                                                   |
| Seborrheic keratosis                 | 1 (0.7)                                               | 0 (0.0)                                                            | 0 (0.0)                                                          | 0 (0.0)                                                           |
| Uterine leiomyoma                    | 0 (0.0)                                               | 1 (0.6)                                                            | 0 (0.0)                                                          | 0 (0.0)                                                           |

<sup>a</sup>Includes non-serious adverse events with onset on or after the first date of double-blind treatment and on or prior to the last day of short-term or long-term double-blind treatment plus 4 days or up to follow-up visit if earlier. Includes serious adverse events with onset on or after the first

date of double-blind treatment, and on or prior to the last day of short-term or long-term double-blind treatment, plus 30 days, or up to follow-up visit if earlier.

**Table S4** Laboratory values of interest: change from baseline at weeks 24 and 48

|                                                  | <b>Placebo<br/>+ glimepiride<br/>(N = 146)</b> | <b>Dapagliflozin 2.5 mg<br/>+ glimepiride<br/>(N = 154)</b> | <b>Dapagliflozin 5 mg<br/>+ glimepiride<br/>(N = 145)</b> | <b>Dapagliflozin 10 mg<br/>+ glimepiride<br/>(N = 151)</b> |
|--------------------------------------------------|------------------------------------------------|-------------------------------------------------------------|-----------------------------------------------------------|------------------------------------------------------------|
| <b>Hematocrit (%)</b>                            |                                                |                                                             |                                                           |                                                            |
| Baseline                                         | 41.83 (3.47)                                   | 41.97 (4.11)                                                | 41.98 (3.23)                                              | 42.25 (3.72)                                               |
| Change at week 24                                | 0.01 [0.17]                                    | 1.93 [0.20]                                                 | 2.28 [0.22]                                               | 2.19 [0.20]                                                |
| Change at week 48                                | -0.26 [0.22]                                   | 2.28 [0.21]                                                 | 2.26 [0.26]                                               | 2.53 [0.21]                                                |
| <b>Serum creatinine (µmol/L)</b>                 |                                                |                                                             |                                                           |                                                            |
| Baseline                                         | 78.3 (19.6)                                    | 77.9 (18.9)                                                 | 75.3 (16.1)                                               | 75.2 (17.0)                                                |
| Change at week 24                                | 0.09 [0.97]                                    | 1.59 [0.77]                                                 | 0.44 [0.83]                                               | 0.71 [0.71]                                                |
| Change at week 48                                | -0.27 [1.03]                                   | 0.53 [0.79]                                                 | 0.44 [0.82]                                               | 0.35 [0.86]                                                |
| <b>Calculated creatinine clearance (mL/min)</b>  |                                                |                                                             |                                                           |                                                            |
| Baseline                                         | 97.6 (30.5)                                    | 100.5 (37.3)                                                | 100.5 (32.3)                                              | 101.3 (32.6)                                               |
| Change at week 24                                | -1.3 [1.06]                                    | -3.5 [1.01]                                                 | -2.4 [1.02]                                               | -4.8 [1.08]                                                |
| Change at week 48                                | -1.6 [1.13]                                    | -4.3 [1.05]                                                 | -3.1 [1.01]                                               | -4.3 [1.31]                                                |
| <b>Estimated GFR (mL/min/1.73 m<sup>2</sup>)</b> |                                                |                                                             |                                                           |                                                            |
| Baseline                                         | 80.2 (19.1)                                    | 80.9 (18.6)                                                 | 83.5 (19.6)                                               | 82.2 (17.9)                                                |
| Change at week 24                                | 0.0 [0.94]                                     | -1.5 [0.89]                                                 | -0.1 [1.02]                                               | -1.2 [1.03]                                                |
| Change at week 48                                | -0.2 [0.96]                                    | -0.7 [0.97]                                                 | -0.4 [1.05]                                               | -0.3 [1.19]                                                |
| <b>Blood urea nitrogen (mmol/L)</b>              |                                                |                                                             |                                                           |                                                            |
| Baseline                                         | 5.8 (1.72)                                     | 5.6 (1.69)                                                  | 5.6 (1.62)                                                | 5.5 (1.54)                                                 |
| Change at week 24                                | 0.04 [0.13]                                    | 0.36 [0.12]                                                 | 0.43 [0.12]                                               | 0.61 [0.11]                                                |

|                                               | <b>Placebo<br/>+ glimepiride<br/>(N = 146)</b> | <b>Dapagliflozin 2.5 mg<br/>+ glimepiride<br/>(N = 154)</b> | <b>Dapagliflozin 5 mg<br/>+ glimepiride<br/>(N = 145)</b> | <b>Dapagliflozin 10 mg<br/>+ glimepiride<br/>(N = 151)</b> |
|-----------------------------------------------|------------------------------------------------|-------------------------------------------------------------|-----------------------------------------------------------|------------------------------------------------------------|
| Change at week 48                             | 0.11 [0.12]                                    | 0.39 [0.13]                                                 | 0.54 [0.14]                                               | 0.68 [0.13]                                                |
| <b>Serum uric acid (µmol/L)</b>               |                                                |                                                             |                                                           |                                                            |
| Baseline                                      | 315.2 (93.6)                                   | 301.6 (81.2)                                                | 303.9 (79.8)                                              | 301.0 (82.4)                                               |
| Change at week 24                             | 1.19 [4.77]                                    | -21.41 [4.29]                                               | -26.17 [5.37]                                             | -26.17 [4.90]                                              |
| Change at week 48                             | 20.22 [5.51]                                   | -17.25 [5.41]                                               | -17.85 [5.46]                                             | -26.17 [4.66]                                              |
| <b>Serum cystatin-C (mmol/L)</b>              |                                                |                                                             |                                                           |                                                            |
| Baseline                                      | 0.56 (0.14)                                    | 0.56 (0.12)                                                 | 0.56 (0.13)                                               | 0.55 (0.12)                                                |
| Change at week 24                             | 0.03 [0.01]                                    | 0.04 [0.01]                                                 | 0.03 [0.01]                                               | 0.04 [0.01]                                                |
| Change at week 48                             | -1.4 [0.9]                                     | 1.7 [1.1]                                                   | 2.3 [1.1]                                                 | 2.2 [1.1]                                                  |
| <b>Urine glucose (mmol/L)</b>                 |                                                |                                                             |                                                           |                                                            |
| Baseline                                      | 26.0 (58.0)                                    | 19.2 (47.7)                                                 | 21.1 (55.3)                                               | 21.7 (48.4)                                                |
| Change at week 24                             | -13.96 [5.68]                                  | 98.53 [8.40]                                                | 119.90 [8.45]                                             | 155.14 [9.28]                                              |
| Change at week 48                             | -13.53 [5.10]                                  | 89.93 [8.88]                                                | 112.79 [8.60]                                             | 151.36 [9.27]                                              |
| <b>Urinary glucose:creatinine ratio (g/g)</b> |                                                |                                                             |                                                           |                                                            |
| Baseline                                      | 6.21 (19.12)                                   | 3.63 (9.8)                                                  | 4.55 (12.38)                                              | 4.96 (13.58)                                               |
| Change at week 24                             | -3.4 [1.58]                                    | 20.7 [2.40]                                                 | 30.0 [2.79]                                               | 35.2 [2.40]                                                |
| Change at week 48                             | -3.4 [1.49]                                    | 18.4 [1.90]                                                 | 26.9 [2.53]                                               | 34.8 [2.29]                                                |

Data are mean (standard deviation) or mean [standard error] using the safety analysis set (\*full analysis set). Measures for urinary glucose and glucose:creatinine ratio were derived from a urinary spot-check performed in the morning fasting state.  $N$  is the number of patients at baseline in the safety analysis set. *GFR* glomerular filtration rate.
