# Supplementary material for: Dapagliflozin Added to Glimepiride in Patients with Type 2 Diabetes Mellitus Sustains Glycemic Control and Weight Loss Over 48 Weeks: A Randomized, Double-Blind, Parallel-Group, Placebo-Controlled Trial
Source: PubMed Central journal article supplement — Diabetes Ther. 2014 Jun 12;5(1):267–83. doi: 10.1007/s13300-014-0072-0 (PMC4065289; doi:10.1007/s13300-014-0072-0), 2014-06-12
Supplement: 13300_2014_72_MOESM2_ESM.pdf [file 13300_2014_72_MOESM2_ESM.pdf]

- Maintenance of efficacy over time is important to establish for treatments of chronic, progressive conditions such as type 2 diabetes mellitus (T2DM).
- This 48-week, double-blind, parallel-group, phase III study in Europe and Asia randomized patients with T2DM and an inadequate response to open-label glimepiride 4 mg/day to receive add-on placebo ( $n = 146$ ) or dapagliflozin 2.5 mg ( $n = 154$ ), 5 mg ( $n = 145$ ) or 10 mg ( $n = 151$ ).
- Over 48 weeks, the sodium-glucose co-transporter 2 (SGLT-2) inhibitor, dapagliflozin, improved glycemic control and decreased body weight and blood pressure versus placebo. Glycemic efficacy was maintained from 24 to 48 weeks.
- Therapy was well-tolerated in general over 48 weeks. Hypoglycemic events and events suggestive of genital infections were reported more often in patients receiving dapagliflozin versus placebo (9.7–11.3 vs. 6.8% and 5.2–8.6 vs. 1.4%, respectively).
- This is the longest study to date of an SGLT-2 inhibitor added to sulfonylurea monotherapy; given the common use of sulfonylureas in the management of T2DM in a number of countries, sustained efficacy and long-term tolerability with add-on therapies of complementary mechanisms of action such as dapagliflozin is important to establish.

This summary slide represents the opinions of the authors. Sponsorship for this study was funded by AstraZeneca and Bristol-Myers Squibb. Medical writing assistance was provided by Simon Lancaster of inScience Communications, Springer Healthcare. Support for this assistance was funded by AstraZeneca and Bristol-Myers Squibb. For a full list of acknowledgments and conflicts of interest for all authors of this article, please see the full text online. Copyright © The Author(s) 2014. Creative Commons Attribution Noncommercial License (CC BY-NC).
